# Supplementary material
Source: PubMed Central journal article supplement (PMC8249377)
Supplement: 41422_2021_514_MOESM4_ESM.pdf [file 41422_2021_514_MOESM4_ESM.pdf]

**Table S4. Data collection and refinement statistics for crystal structures.**

|                                     | BD-508/RBD<br>(PDB ID: 7E86) | BD-515/RBD<br>(PDB ID: 7E88) | BD-623/RBD<br>(PDB ID: 7E7Y) | N12-11/NTD<br>(PDB ID: 7E7X) |
|-------------------------------------|------------------------------|------------------------------|------------------------------|------------------------------|
| <b>Data collection</b>              |                              |                              |                              |                              |
| Resolution (Å)                      | 2.90                         | 3.15                         | 2.41                         | 2.78                         |
| Space group                         | $C222_1$                     | $P1$                         | $P2_12_12_1$                 | $P2_12_12$                   |
| Cell dimensions                     |                              |                              |                              |                              |
| $a, b, c$ (Å)                       | 82.4, 148.7, 147.8           | 103.7, 107.6, 108.8          | 93.8, 126.6, 138.9           | 91.4, 113.3, 210.9           |
| $\alpha, \beta, \gamma$ (°)         | 90.0, 90.0, 90.0             | 63.3, 81.0, 66.8             | 90.0, 90.0, 90.0             | 90.0, 90.0, 90.0             |
| Multiplicity                        | 13.3 (13.4)                  | 3.5 (3.5)                    | 13.5 (13.8)                  | 13.1 (13.2)                  |
| Completeness (%)                    | 99.7 (99.4)                  | 96.5 (87.8)                  | 98.1(93.6)                   | 98.7(92.7)                   |
| $I / \sigma I$                      | 9.4 (2.2)                    | 10.0 (2.0)                   | 11.0 (2.1)                   | 15.2 (2.4)                   |
| Wilson B-factor                     | 53.8                         | 81.4                         | 38.2                         | 53.3                         |
| $R_{\text{merge}}$                  | 0.29 (1.13)                  | 0.07 (0.40)                  | 0.13 (0.74)                  | 0.16 (0.90)                  |
| $R_{\text{meas}}$                   | 0.30 (1.18)                  | 0.09 (0.47)                  | 0.14 (0.77)                  | 0.17 (0.94)                  |
| $R_{\text{pim}}$                    | 0.08 (0.32)                  | 0.04 (0.24)                  | 0.04 (0.21)                  | 0.04 (0.25)                  |
| $CC_{1/2}$                          | 0.98 (0.77)                  | 0.99 (0.90)                  | 0.99 (0.90)                  | 0.99 (0.93)                  |
| <b>Refinement</b>                   |                              |                              |                              |                              |
| Reflections used in refinement      | 20474 (2022)                 | 65003 (5893)                 | 63148 (5923)                 | 55215 (5905)                 |
| Reflections used for R-free         | 1980 (190)                   | 2012 (198)                   | 1977 (185)                   | 1988 (183)                   |
| $R_{\text{work}} / R_{\text{free}}$ | 0.196/0.255                  | 0.217/0.255                  | 0.198/0.242                  | 0.239/0.278                  |
| Number of non-hydrogen atoms        | 4698                         | 18866                        | 9916                         | 9767                         |
| macromolecules                      | 4698                         | 18866                        | 9339                         | 9767                         |
| ligand/ion                          | 0                            | 0                            | 0                            | 0                            |
| solvent                             | 0                            | 0                            | 577                          | 0                            |
| Protein residues                    | 613                          | 2447                         | 1235                         | 1280                         |
| RMS(bonds)                          | 0.01                         | 0.011                        | 0.009                        | 0.003                        |
| RMS(angles)                         | 1.32                         | 1.44                         | 1.03                         | 0.89                         |
| Ramachandran favored (%)            | 93.53                        | 93.31                        | 96.05                        | 94.86                        |
| Ramachandran allowed (%)            | 6.47                         | 6.69                         | 3.95                         | 5.14                         |
| Ramachandran outliers (%)           | 0                            | 0                            | 0                            | 0                            |
| Average B-factor                    | 45.99                        | 89.42                        | 39.04                        | 60.67                        |

Each dataset was collected from a single crystal. Values in parentheses are for highest-resolution shell.
