# Supplementary material
Source: PubMed Central journal article supplement (PMC8249377)
Supplement: 41422_2021_514_MOESM5_ESM.pdf [file 41422_2021_514_MOESM5_ESM.pdf]

**Table S5. Cryo-EM data collection, processing, and validation statistics**

|                                                      | S6P in complex with the Fabs of BD-368-2, BD-604, and N12-9 (PDB:7E8C; EMD: EMD-31014) | The local structure of NTD-RBD together with the Fabs of BD-368-2, BD-604, and N12-9 (PDB: 7E8F; EMD: EMD-31017) |
|------------------------------------------------------|----------------------------------------------------------------------------------------|------------------------------------------------------------------------------------------------------------------|
| <b>Data collection and processing</b>                |                                                                                        |                                                                                                                  |
| Voltage (kV)                                         | 300                                                                                    |                                                                                                                  |
| Microscope                                           | FEI Titan Krios G3                                                                     |                                                                                                                  |
| Camera                                               | K2 Summit (Gatan)                                                                      |                                                                                                                  |
| Magnification (calibrated)                           | 130,000X                                                                               |                                                                                                                  |
| Electron exposure (e <sup>-</sup> /Å <sup>2</sup> )  | 63.27                                                                                  |                                                                                                                  |
| Exposure rate (e <sup>-</sup> /Å <sup>2</sup> /s)    | 7.6046                                                                                 |                                                                                                                  |
| Number of frames collected per micrograph            | 32                                                                                     |                                                                                                                  |
| Energy filter slit width                             | 20 eV                                                                                  |                                                                                                                  |
| Automation software                                  | SerialEM                                                                               |                                                                                                                  |
| Defocus range (μm)                                   | -0.6 to -1.2                                                                           |                                                                                                                  |
| Pixel size (Å)                                       | 1.052                                                                                  |                                                                                                                  |
| Micrographs used                                     | 3,957                                                                                  |                                                                                                                  |
| Symmetry imposed                                     | C1                                                                                     | C1                                                                                                               |
| Initial particle images                              | 858,315                                                                                | 535,671                                                                                                          |
| Final particle images                                | 178,557                                                                                | 304,696                                                                                                          |
| Resolution at 0.5 FSC of masked reconstruction (Å)   | 3.79                                                                                   | 3.66                                                                                                             |
| Resolution at 0.143 FSC of masked reconstruction (Å) | 3.16                                                                                   | 3.18                                                                                                             |
| Map sharpening B factor (Å <sup>2</sup> )            | -70.48                                                                                 | -113.22                                                                                                          |
| <b>Refinement</b>                                    |                                                                                        |                                                                                                                  |
| Initial model used (PDB code)                        | 7CHH, 7CHF                                                                             | 7CHH, 7CHF                                                                                                       |
| Refinement package                                   | Phenix v1.18 (Real-space refinement at 3.16 Å)                                         | Phenix v1.18 (Real-space refinement at 3.18 Å)                                                                   |
| Map-model CC                                         |                                                                                        |                                                                                                                  |
| CC_mask                                              | 0.70                                                                                   | 0.81                                                                                                             |
| CC_box                                               | 0.71                                                                                   | 0.68                                                                                                             |
| CC_peaks                                             | 0.57                                                                                   | 0.62                                                                                                             |
| CC_volume                                            | 0.69                                                                                   | 0.79                                                                                                             |
| Model composition                                    |                                                                                        |                                                                                                                  |
| Non-hydrogen atoms                                   | 40,225                                                                                 | 8,768                                                                                                            |
| Protein residues                                     | 5,218                                                                                  | 1,134                                                                                                            |
| Ligands                                              | 0                                                                                      | 0                                                                                                                |
| R.m.s. deviations                                    |                                                                                        |                                                                                                                  |
| Bond lengths (Å)                                     | 0.009                                                                                  | 0.005                                                                                                            |
| Bond angles (°)                                      | 0.872                                                                                  | 0.674                                                                                                            |
| B factors (Å <sup>2</sup> )                          |                                                                                        |                                                                                                                  |
| Protein                                              | 73.71                                                                                  | 64.92                                                                                                            |
| Validation                                           |                                                                                        |                                                                                                                  |
| MolProbity score                                     | 2.71                                                                                   | 1.95                                                                                                             |
| Clashscore                                           | 14.31                                                                                  | 8.89                                                                                                             |
| Poor rotamers (%)                                    | 6.48                                                                                   | 0                                                                                                                |

|                        |       |       |
|------------------------|-------|-------|
| Ramachandran plot      |       |       |
| Favored (%)            | 93.37 | 92.45 |
| Allowed (%)            | 6.61  | 5.24  |
| Disallowed (%)         | 0.02  | 0     |
| C $\beta$ outliers (%) | 0.00  | 0.00  |
| CaBLAM outliers (%)    | 3.34  | 3.21  |

---
