# Supplementary material
Source: PubMed Central journal article supplement (PMC8249377)
Supplement: 41422_2021_514_MOESM6_ESM.pdf [file 41422_2021_514_MOESM6_ESM.pdf]

**Fig. S1 Flow cytometry sorting of antigen-positive memory B cells.**

**a.** Gating strategy used for PBMC sample. Gating was on singlets that were 7AAD-CD3-CD14-CD16-CD19+CD27+. Sorted cells were antigen positive. **b.** Gating strategy used for MACS sorted B cells sample. Gating was on singlets that were 7AAD-CD14-CD16-CD19+CD27+. Sorted cells were antigen positive. **c.** Examples of cell sorting from ZF2001 vaccinees' PBMC (R11-R20) and healthy donors' PBMC (NC). **d.** Examples of cell sorting from Coronavac vaccinees MACS sorted B cells (I).
