# Supplementary material
Source: PubMed Central journal article supplement (PMC8249377)
Supplement: 41422_2021_514_MOESM7_ESM.pdf [file 41422_2021_514_MOESM7_ESM.pdf]

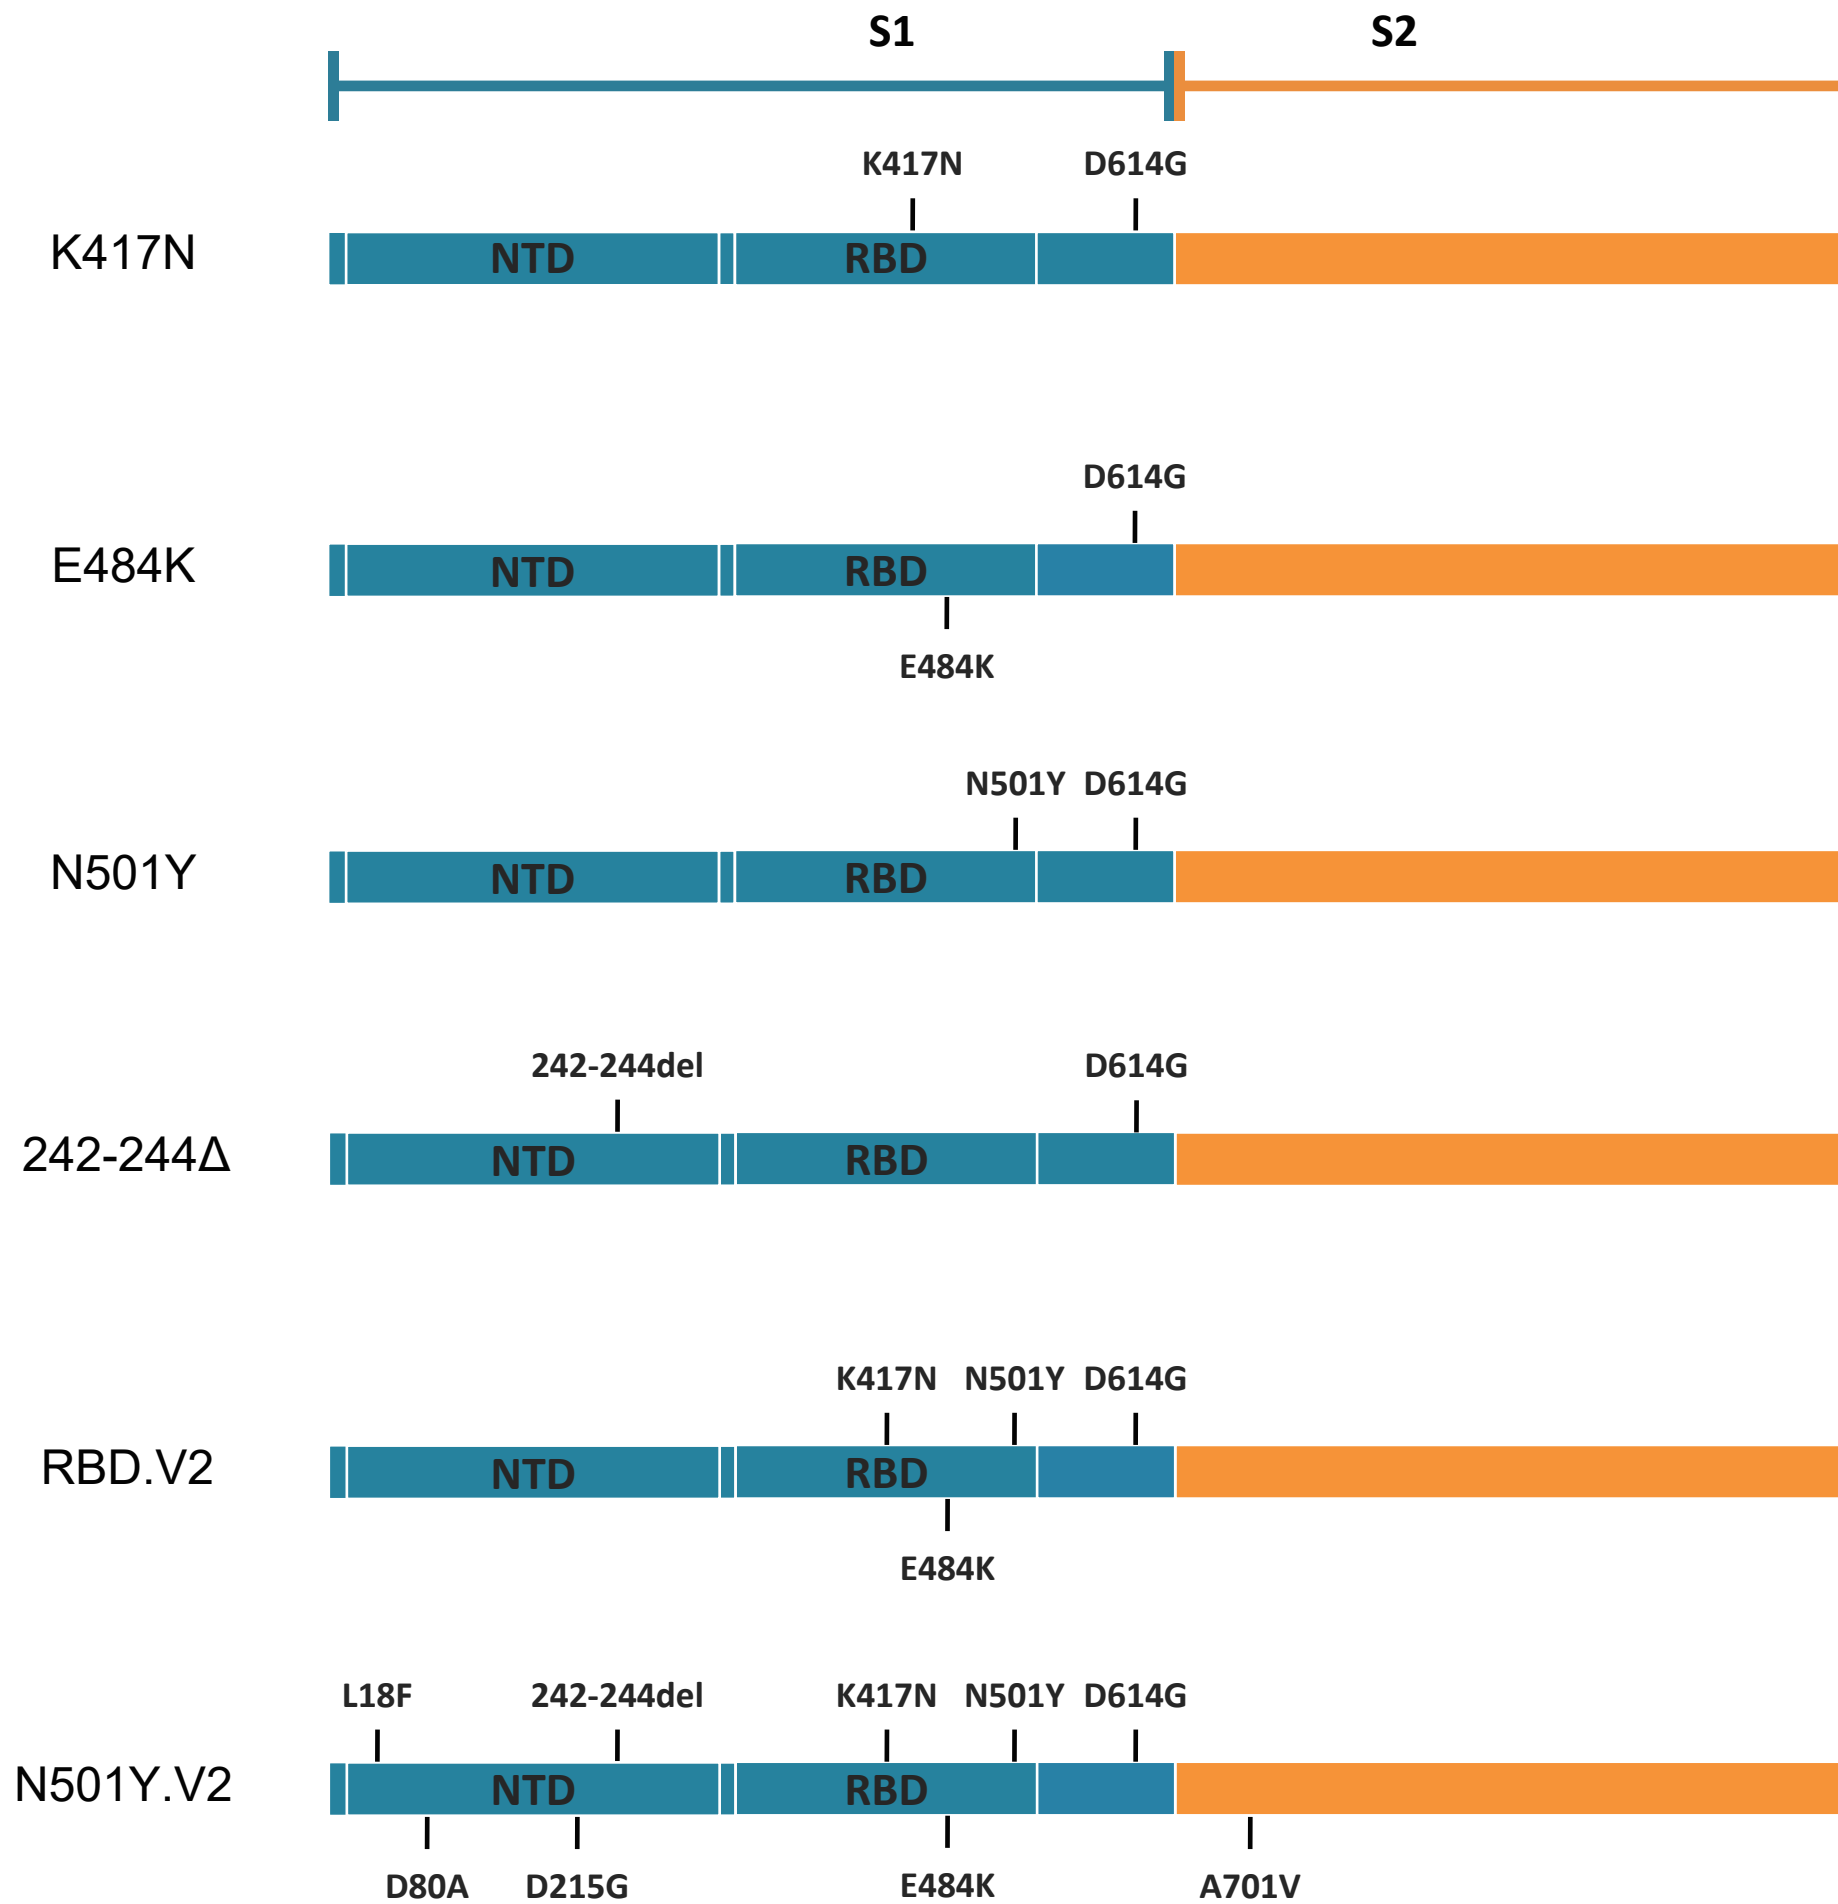

**Fig. S2 Illustration of the pseudoviruses bearing SARS-CoV-2 S mutations.**

A total of 6 VSV-pseudovirus carrying RBD and NTD mutants of 501Y.V2 is constructed and used in this study.
