# Supplementary material
Source: PubMed Central journal article supplement (PMC8249377)
Supplement: 41422_2021_514_MOESM8_ESM.pdf [file 41422_2021_514_MOESM8_ESM.pdf]

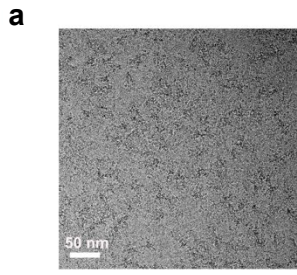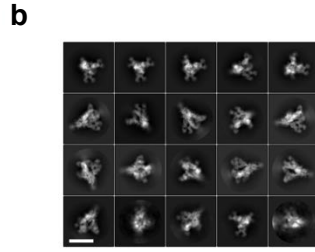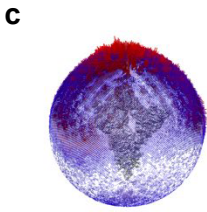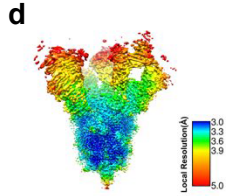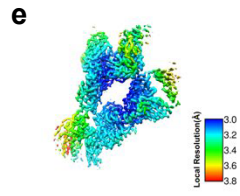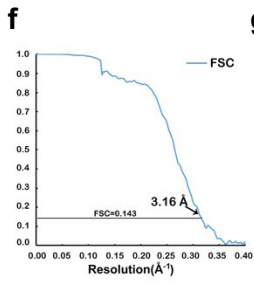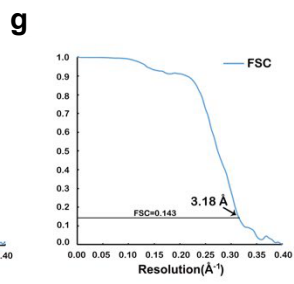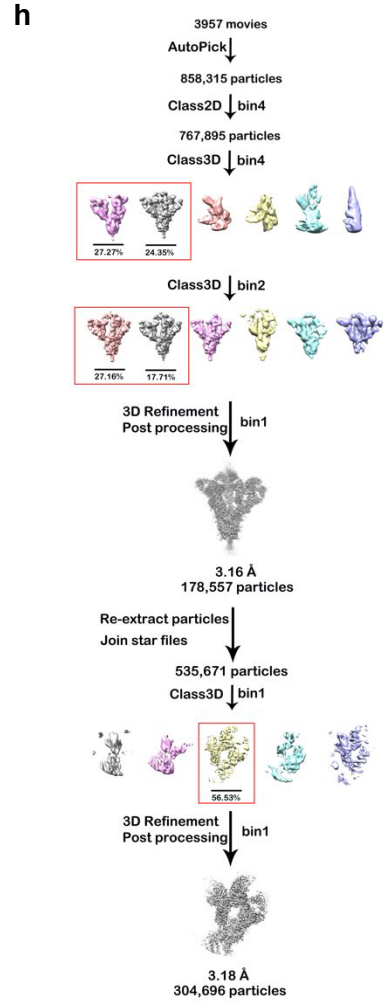

**Fig. S3. Workflow for the 3D reconstruction of the cryo-EM structure of the S6P trimer in complex with the Fabs of BD-368-2, BD-604, and N12-9.**

**a.** A representative raw image collected using a Titan Krios 300 kV equipped with a K2 detector. **b.** Representative 2D classes. **c.** Eulerian angle distribution of the particles used in the final 3D reconstruction. **d.** Local resolution estimation of the overall density map. **e.** Local resolution estimation of the local density map around the region containing the NTD, RBD, and three Fabs. **f.** Gold standard Fourier shell correlation (FSC) curve with the estimated resolution for the overall density map. **g.** FSC curve with the estimated resolution for the local density map. **h.** Flow chart of image processing.
